# Supplementary material
Source: PubMed Central journal article supplement (PMC3431162)
Supplement: NIHMS397352-supplement-Suppl__Information.pdf [file NIHMS397352-supplement-Suppl__Information.pdf]

### **Supplementary information:**

**Culture conditions.** The human glioma cell lines U251 MG, A172, and U373 MG (from the American Type Culture Collection, Manassas, VA) were maintained in Dulbecco's modified Eagle's medium (DMEM)/F12 (1:1, vol/vol) supplemented with 10% fetal bovine serum (SAFC Biosciences, Lenexa, KS) and 1% antibiotic-antimycotic mixture containing penicillin 5,000 U/ml and streptomycin 5,000 U/ml. Neurospheroid cultures were established from acute cell dissociation in human glioblastoma (GBM) postsurgical specimens and maintained in DMEM/F12 supplemented with B27 (Invitrogen, Carlsbad, CA), epidermal growth factor (EGF) and basic fibroblast growth factor (bFGF; 20 ng/ml each; Sigma-Aldrich, St. Louis, MO) according to previously described procedures (Galli *et al.*, 2004; Singh *et al.*, 2004). We previously developed Tie2-overexpressing and vector-transfected U251 MG cells (U251.Tie2 and U251.vector, respectively), and we maintained these cells in growth medium containing G418 300 µg/ml (Lee *et al.*, 2006). Cells were incubated at 37°C in a 5% CO<sub>2</sub> atmosphere.

**Quantitative Real-Time PCR.** We performed quantitative real-time PCR (qPCR) of ABC transporter mRNA levels using the SYBR green real-time PCR method with SYBR green PCR core reagents (ABI Systems; Foster City, CA) in the Chromo4 Real-Time PCR System (Bio-Rad; Hercules, CA). The sequences of the sense and antisense primers used were as follows: human ABCG2, 5'-AGTTCCATGGCACTGGCCATA-3' and 5'-TCAGGTAGGCAATTGTGAGG-3'; ABCC2, 5'-TCGCTGAAGTGAGAGTAGATT-3' and 5'-TCCTTGGCGAGCTGGATTACA-3'; human MDR1, 5'-CCCATCATTGCAATAGCAGG-3' and 5'-TGTTCAAACCTTCTGCTCCTGA-3', human MRP1: 5'-ATGGGGAAGGTGAAGGTCGG-3' and 5'-GACGGTGCCATGGAATTTGC-3'; and human GADPH: 5'-ATGGGGAAGGTGAAGGTCGG-3' and 5'-GACGGTGCCATGGAATTTGC-3'.

Each amplification cycle consisted of denaturation for 15 s at 95°C and annealing/extension for 1 min at 60°C. We conducted qPCR for 40 cycles, and we added one additional step, a melting curve, to distinguish the specific products from nonspecific products and primer dimers. We constructed the melting curve by increasing the temperature from 60°C to 95°C, with a temperature transition rate of 0.2°C/s. Each sample was tested in triplicate, and we analyzed the relative gene expression data using the comparative threshold cycle method (Alonso *et al.*, 2007).

**Statistical comparisons** were carried out using either the *t* test or one-way analysis of variance (ANOVA) followed by a Student-Newman-Keuls multiple range test.

## References

- Alonso MM, Gomez-Manzano C, Bekele BN, Yung WK, Fueyo J. (2007). Adenovirus-based strategies overcome temozolomide resistance by silencing the O6-methylguanine-DNA methyltransferase promoter. *Cancer Res* 67: 11499-11504.
- Galli R, Binda E, Orfanelli U, Cipelletti B, Gritti A, De Vitis S et al. (2004). Isolation and characterization of tumorigenic, stem-like neural precursors from human glioblastoma. *Cancer Res* 64: 7011-7021.
- Lee OH, Xu J, Fueyo J, Fuller GN, Aldape KD, Alonso MM et al. (2006). Expression of the receptor tyrosine kinase Tie2 in neoplastic glial cells is associated with integrin beta1-dependent adhesion to the extracellular matrix. *Mol Cancer Res* 4: 915-926.
- Singh SK, Hawkins C, Clarke ID, Squire JA, Bayani J, Hide T et al. (2004). Identification of human brain tumour initiating cells. *Nature* 432: 396-401.
